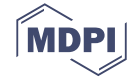

Article

# UNRAVELLING THE PHYLOGENOMIC RELATIONSHIPS OF THE MOST DIVERSE AFRICAN PALM GENUS *Raphia* (CALAMOIDEAE, ARECACEAE)

Andrew J. Helmstetter <sup>1,†</sup> , Suzanne Mogue Kamga <sup>2</sup>, Kevin Bethune <sup>3</sup>, Thea Lautenschläger <sup>4</sup> , Alexander Zizka <sup>5</sup> , Christine D. Bacon <sup>6</sup> , Jan J. Wieringa <sup>7</sup> , Fred Stauffer <sup>8</sup> , Alexandre Antonelli <sup>9</sup> , Bonaventure Sonké <sup>10</sup>  and Thomas L.P. Couvreur <sup>11,\*</sup> 

<sup>1</sup> IRD, DIADE, Univ Montpellier, Montpellier, France; andrew.j.helmstetter@gmail.com

<sup>2</sup> Université de Yaoundé I, Ecole Normale Supérieure, Département des Sciences Biologiques, Laboratoire de Botanique systématique et d'Ecologie, B.P. 047, Yaoundé Cameroon ; mogueblue@yahoo.com

<sup>3</sup> IRD, DIADE, Univ Montpellier, Montpellier, France; kevin.bethune@hotmail.fr

<sup>4</sup> Department of Biology, Institute of Botany, Faculty of Science, Technische Universität Dresden, 01062 Dresden, Germany ; thea.lautenschlaeger@tu-dresden.de

<sup>5</sup> German Center for Integrative Biodiversity Research (iDiv) Halle -Leipzig-Jena, Leipzig, Germany

<sup>6</sup> Department of Biological and Environmental Sciences and Gothenburg Global Biodiversity Centre, University of Gothenburg, Gothenburg, Sweden; christine.bacon@bioenv.gu.se

<sup>7</sup> Naturalis Biodiversity Center, Darwinweg 2, 2333 CR, Leiden, the Netherlands; jan.wieringa@naturalis.nl

<sup>8</sup> Department of Botany and Plant Biology, Conservatory and Botanical Garden of the City of Geneva, University of Geneva, Geneva, Switzerland; Fred.Stauffer@ville-ge.ch

<sup>9</sup> Department of Biological and Environmental Sciences and Gothenburg Global Biodiversity Centre, University of Gothenburg, Gothenburg, Sweden; and Royal Botanic Gardens, Kew, Richmond, UK; a.antonelli@kew.org

<sup>10</sup> Université de Yaoundé I, Ecole Normale Supérieure, Département des Sciences Biologiques, Laboratoire de Botanique systématique et d'Ecologie, B.P. 047, Yaoundé Cameroon; bsonke\_1999@yahoo.com

<sup>11</sup> IRD, DIADE, Univ Montpellier, Montpellier, France; Thomas.Couvreur@ird.fr

\* Correspondence: Thomas.Couvreur@ird.fr

† Current address: FRB-Cesab, Institut Bouisson Bertrand, 5, rue de l'Ecole de médecine - 34000 Montpellier, France

Version March 11, 2020 submitted to Plants

**Abstract:** Palms are conspicuous floristic elements across the tropics. In continental Africa, even though there are less than 70 documented species, they are omnipresent across the tropical landscape. The genus *Raphia* has 20 accepted species in Africa and one species endemic to the Neotropics. It is the most economically important genus of African palms with most of its species producing food and construction material. *Raphia* is divided into five sections based on inflorescence morphology. Nevertheless, the taxonomy of *Raphia* is problematic with no intra-generic phylogenetic study available. We present a phylogenetic study of the genus using a targeted exon capture approach sequencing of 56 individuals representing 18 out of the 21 species. Our results recovered five well supported clades within the genus. These reflect to a certain extent the sections as defined based on inflorescence morphology. Overall, morphological based identifications agreed well with our phylogenetic analyses, with 12 species recovered as monophyletic based on our sampling. Species delimitation analyses recovered 17 or 23 species depending on the confidence level used. Species delimitation is especially problematic in the Raphiate and Temulentae sections. In addition, our clustering analysis using SNP data suggested that individual clusters matched geographic distribution. The Neotropical species *R. taedigera* is supported as a distinct species, rejecting the hypothesis of a recent introduction into South America. Our analyses support the hypothesis that the *Raphia* individuals from Madagascar are potentially a distinct species different from the widely

18 distributed *R. farinifera*. In conclusion, our results support the infra generic classification of *Raphia*  
19 based on inflorescence morphology, which is shown to be phylogenetically useful. Classification  
20 and species delimitation within sections remains problematic even with our phylogenomic approach.  
21 Certain widely distributed species could potentially contain cryptic species. More in-depth studies  
22 should be undertaken using morphometrics, increased sampling and more variable markers.  
23 Our study provides a robust phylogenomic framework that enables further investigation on the  
24 biogeographic history, morphological evolution and other eco-evolutionary aspects of this charismatic,  
25 socially and economically important palm genus.

26 **Keywords:** Africa, exons, Madagascar, rain forests, phylogenomics, *Raphia*, sequence capture

---

## 27 1. Introduction

28 Palms are iconic floristic elements across the tropics both in terms of diversity and the natural  
29 resources they provide, playing important roles for the welfare of rural and urban people at equatorial  
30 latitudes. Worldwide, there are an estimated 2500 palm species [1], mainly occurring in tropical  
31 rain forests. Africa, however, harbours less than 70 species (excluding Madagascar) [2,3], a pattern  
32 that contrasts strongly with the Neotropics or South East Asia, which contain 800 and 1200 species  
33 respectively [1,4,5]. Despite this low diversity, palms are omnipresent across the African landscape,  
34 particularly in the tropical rain forests of the continent [2,6].

35 Among African palms, the genus *Raphia* (subfamily Calamoideae, tribe Raphiaeeae) is the most  
36 species rich, with 21 species described to date [2,7]. Of these, one, *R. taedigera*, is endemic to the  
37 Neotropics, with a disjunct distribution in Brazil and central America. The presence of this species  
38 in the Neotropics was suggested as either pre-Colombian and natural (biogeographic long distance  
39 dispersal/vicariance [8,9]) or as recently naturalized by Africans during the slave trade some 400  
40 years ago [6,10,11]. *Raphia* species mainly occur in tropical rain forests, most often in swampy or  
41 periodically inundated areas where they can dominate the vegetation, producing dense monospecific  
42 stands (known as "Raphiales" in French). A few species, however, have adapted to drier conditions  
43 restricted to river systems in the Sahel or southern Africa.

44 *Raphia* is the most economically important genus of African palms across tropical African  
45 communities. One recent study documented over 100 different uses across the genus, with the most  
46 important ones being extraction of palm wine, grubs and construction material [12,13]. Exploitation of  
47 its species in the wild also represents an important source of income for populations across tropical  
48 Africa, especially for low-income households [12,14,15]. In addition, *Raphia* species play vital ecological  
49 roles in wet land ecosystems [16] where they dominate the landscape, such as in peatlands of the  
50 Congo Basin where they are highly abundant [17]. *Raphia* dominated swamps are also important  
51 ecosystems for the protection for critically endangered animals such as the lowland gorillas because  
52 hard to access or cultivate (e.g. [18]).

53 *Raphia* species are massive palms with very long pinnate leaves. One species holds the record for  
54 the longest measured leaf in angiosperms, reaching up to 25 meters (*R. regalis*). The trunk is generally  
55 above-ground and is solitary or clustered, while two species (*R. regalis* and *R. vinifera*) have very short  
56 or subterranean (acaulescent) trunks. When present, the trunk can be covered by old leaves or a  
57 dense network of fibres, which can be curly or straight, an important character to identify species (e.g.  
58 [19,20]). *Raphia* species are monoecious, with male and female flowers on the same individual and are  
59 hapaxanthic, meaning that individual stems die after a single flowering event [1]. The inflorescences  
60 structure is relatively simple and branched to two orders [1]. The first and second order branches, or  
61 rachillae, are referred to as the "partial inflorescence" [21]. The shape and overall morphology of these  
62 partial inflorescences are one of the most important taxonomic characters for species identification and  
63 to define the different sections of the genus [20,21].

64 Despite its importance, *Raphia* remains one of the least understood palm genera in terms of  
65 taxonomy and phylogenetic relationships [1,20]. This is mainly due to their massive size, making  
66 them difficult to collect for non-specialists, which leads to few herbarium specimens or specimens that  
67 are incomplete or fragmentary. Several attempts have been undertaken to tackle the taxonomy of the  
68 genus, beginning in the early 1900s with the first complete monograph of the genus [22]. This was  
69 followed by more regional attempts through the last century [23,24]. The last major revision of the  
70 genus was undertaken by Otedoh [21], who placed species into five different sections based on the  
71 structure of the partial inflorescence: Moniliformes (including the subsection Erectae), Temulentae,  
72 Raphiate, Flabellatae and Obclavatae.

73 The six species within the Moniliformes section are characterized by thin and easily breakable  
74 rachillae when fresh (1 B). Otedoh [21] also created a subsection, Erectae, where he placed two species  
75 in which the inflorescences are defined as erect (*R. australis*, *R. regalis*) (1 G, O). The Temulentae section  
76 has robust and tightly appressed rachillea. The partial inflorescences are racquet-shaped with the  
77 apical second order rachillae shorter than the basal ones (1 E). This section contains three (possibly  
78 four) species, including one of the most widespread and important species *R. hookeri*. With seven  
79 species, the Raphiate section is the most complex group of the genus. Several species are only known  
80 from a few collections or just the type. This section is characterized by species having second order  
81 rachillae that are robust (thick) but loosely disposed between them (1 D). The inflorescence within  
82 this section can be semi-erect or drooping (1 I). The Flabellatae section contains two species with very  
83 characteristic partial inflorescence structures. The second order rachillae are tightly packed in a single  
84 plane being racket-shaped in appearance (1 F). The inflorescence also has very conspicuous bracts that  
85 cover completely or partially the partial inflorescences (1 O). Finally, the Obclavatae section contains  
86 one species (*R. sudanica*) with distinct club-shaped and compact partial inflorescences with large bracts  
87 covering too (1 C).

88 To date, no in depth morphological or molecular phylogenetic study of *Raphia* has been  
89 undertaken. The current phylogenetic analysis of the Calamoideae subfamily only included a single  
90 species, namely *R. farinifera* [25]. The main objective of this study is to generate a densely sampled  
91 phylogenetic tree of the genus and test the validity of the taxonomic sections of Otedoh [21]. In  
92 particular, we test if the partial inflorescence structure has a phylogenetic signal and is useful for *Raphia*  
93 species classification. In addition, by sampling several individuals per morphologically identified  
94 species, we also tested species limits and monophyly. In order to achieve these objectives we sequenced  
95 more than 150 palm specific nuclear markers across 56 *Raphia* accessions. We used a species delimitation  
96 approach to define species limits and generated SNP data to study at fine-scale genetic relationships in  
97 identified species complexes.

## 98 2. Results

### 99 2.1. DNA sequencing

100 We sequenced 56 individuals representing 18 species or 87.5% of the species diversity within the  
101 genus. A total of 15.4 million reads were generated and mapped to the reference exons belonging to  
102 176 genes of the Heyduk et al. [26] bait kit. Across all *Raphia* and outgroup individuals the average  
103 coverage depth was 139.6x. We identified 102 genes for which 75% of the exon length was recovered in  
104 at least 25% of individuals. 20 loci were flagged by Hybpiper as paralogs because multiple assembled  
105 contigs matched a single reference locus. Those that occurred in the 75/25 set were removed, resulting  
106 in a final dataset of 85 supercontigs equalling 162kb of sequence data. Our SNP calling approach  
107 applied filters on mapping quality (>40%) depth (>25), quality by depth (>2), minimum depth across  
108 individuals (>10) minor allele frequency (>0.01) and we excluded monomorphic site. This ultimately  
109 yielded 915 and 1,627 high-quality, biallelic SNPs for the *R. hookeri* and *R. zamiana* species complexes,  
110 respectively (see below).

111 2.2. Evolutionary history of *Raphia*

112 We generated two phylogenetic hypotheses for *Raphia* using two distinct methods. The first  
113 analysis was conducted based on a gene-tree coalescent approach using ASTRAL while the second  
114 inferred phylogenetic relationships based on a concatenated approach using IQ-TREE.

115 Support varied throughout the *Raphia* ASTRAL tree - about 50% of branches had a local posterior  
116 probability (LPP) above 75% (see Figure 1 in the main text). Major clades were well supported (LPP >  
117 80%) while relationships towards the tips of the tree generally had lower support. The final normalized  
118 quartet score, the proportion of quartet trees that agree with the species tree, was 65%, indicating that  
119 there is gene tree conflict in the genus.

120 The IQ-TREE concatenated approach (see Figure A1 in the supplementary materials) had increased  
121 bootstrap support compared to ASTRAL. More than 88% of branches had bootstrap support greater  
122 than 75%. The best partitioning scheme put the 85 loci into 20 different partitions. Major clades were  
123 again well-supported in this tree (bootstrap > 80%).

124 Our phylogenetic analyses recovered five well supported clades. Overall, these clades  
125 corresponded with the sections as defined by Otedoh [21]. *Raphia regalis* was always inferred with  
126 strong support as sister to the rest of the genus independent of the inference method (Figures 1,  
127 A1). When comparing the two phylogenetic approaches we identify a topological difference in the  
128 phylogenetic placement of the section Temulentae, the species *R. matombe* and the Moniliformes and  
129 Flabellatae sections 2. In the IQ-TREE we find weak support for the Temulentae to be sister to all *Raphia*  
130 (except *R. regalis*) (Figure 2a) yet the ASTRAL tree indicates with higher support that Temulentae is  
131 sister to a clade containing *R. matombe*, Moniliformes & Flabellatae (Figure 2b).

132 The relationships between species in the Raphiate section are weakly to moderately supported  
133 in both analyses (Figures 1,A1). Nevertheless, we do recover monophyletic groups in some species  
134 consistent with prior morphological identifications. This is the case for individuals of *R. laurentii* and  
135 *R. monbuttorum*, which despite low support are monophyletic. Furthermore, both these species are  
136 recovered as sister, with moderate to high support. However, our species delimitation analysis suggests  
137 that individuals identified under both species are conspecific (Figure 1 A). Support is generally higher  
138 in the ASTRAL tree, even when taking into account different gene histories, so we suggest that the  
139 ASTRAL tree represent a more accurate reconstruction of the phylogeny of *Raphia* (Fig. 2b) so we will  
140 principally refer to the relationships in this tree from now on.

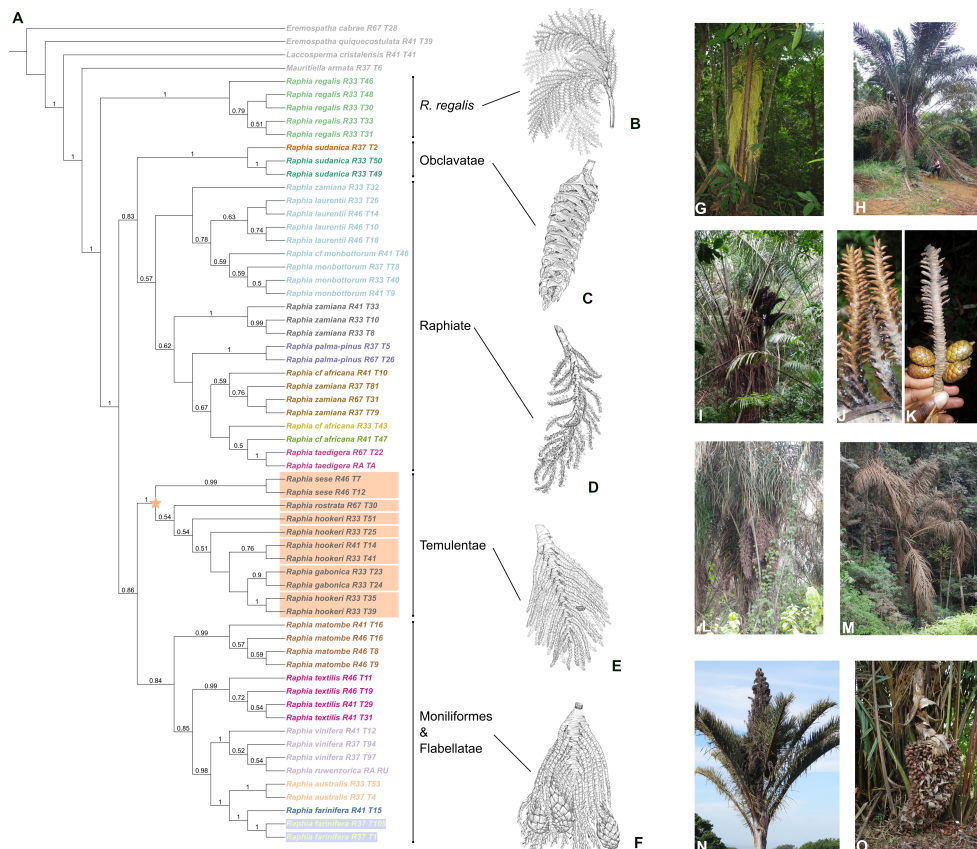

**Figure 1.** A: Cladogram of the genus *Raphia* inferred using 85 gene trees and ASTRAL. Values of local posterior probabilities are shown above the branches. Branch lengths are represented in Figure A2. Individuals are color coded based on the hypothesis of species delimitation inferred using SODA with  $\alpha = 0.01$ . A single clade, the Temulentae section marked with a star and referred to as "hookeri complex" in the main text, varied between our two values of  $\alpha$ . The orange boxes represent the species limits using SODA with a more stringent value of  $\alpha = 0.005$ . Tip names contain the species name as well as the sequencing ID. B: *R. regalis* partial inflorescence representing the Moniliformes section, but see discussion. C: *R. sudanica* inflorescence, representing the Obclavatae section. D: *R. palma-pinus* inflorescence, representing the Raphiate section. E: *R. hookeri* inflorescence, representing the Temulentae section. F: *R. farinifera* inflorescence, representing the Flabellatae section. G: *R. regalis*, note the inflorescence subtended by the leaves (Couvreur 398, Cameroon). H: *R. zamiana* (Mogue Kamga 17, Gabon). I: *R. monbuttorum* (Couvreur 1212, Cameroon). J: detail of *R. monbuttorum* rachillae (Couvreur 1212, Cameroon). K: detail of *R. laurentii* rachillae (Mogue Kamga 39, Democratic Republic of Congo). L: *R. hookeri* (no voucher, Cameroon). M: *R. gabonica* (Mogue Kamga 22, Gabon). N: *R. australis* (no voucher, South Africa, Kirstenbosch Botanic Garden). O: Inflorescence of *R. vinifera* (Couvreur 638, Cameroon). B-F: Drawings reproduced from [23]; Photos G-J, L-O: T.L.P. Couvreur; Photo K: S. Mogue Kamga.

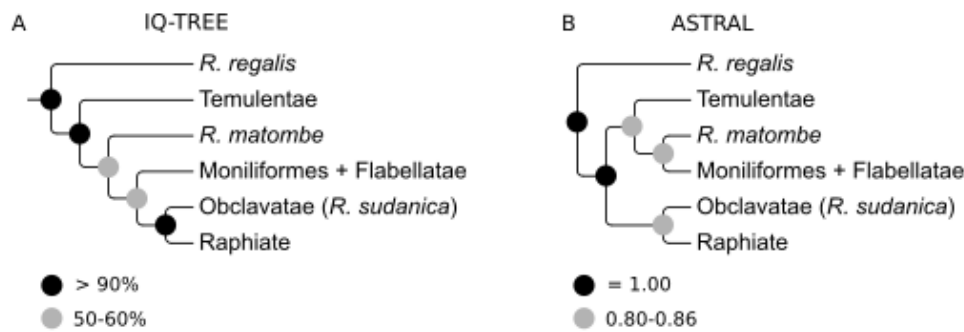

**Figure 2.** Major incongruences between the (A) concatenation (IQ-TREE) and (B) gene tree (ASTRAL) phylogenetic approaches. Both trees have been modified to show the relationships among major *Raphia* clades. Support values are indicated on the nodes as either (a) bootstrap or (b) local posterior probability.

### 141 2.3. Species delimitation

142 Our species delimitation approach yielded between 17 ( $\alpha = 0.005$ ) and 23 ( $\alpha = 0.01$ ) species in  
143 *Raphia* genus (Figure 1). Higher values of  $\alpha$  split a clade of closely related individuals (marked with a  
144 star in Figure 1), predominantly belonging to *R. hookeri*, into seven different species. Generally, our  
145 species delimitation results corresponded to in field morphological classification of *Raphia* species  
146 using available floras (e.g. [19,20]). In some cases we found that SODA split individuals belonging  
147 *a priori* to a single species into multiple species, for example *R. farinifera* and *R. sudanica* (Fig. 1).  
148 Conversely, individuals assigned to different species such as *R. laurentii* and *R. monbottorum* were  
149 classified as the same species after SODA delimitation independent of  $\alpha$  values. In general, the support  
150 among different species as delimited by SODA was high (Figure 1).

### 151 2.4. Fine scale structure in two species-complexes

152 To further explore genetic structure among our two main species complex, namely the "zamiana  
153 complex" and the "hookeri complex" (marked with a triangle and star in Figure 1), we used SNPs  
154 extracted from the sequence data to look at the variation among individuals. The "hookeri" complex  
155 showed little evidence of clustering, with most individuals evenly spread out on the first two principal  
156 component (PC) axes (Figure 3a). We observed two major groups of >8 individuals in the "zamiana"  
157 complex along PC1 (Figure 3b), separating all of the *R. laurentii* and *R. monbottorum* from the rest of  
158 the individuals. The first two PCs in both analyses explained 7-10% of the variance in the dataset. In  
159 general, our SNP data supports SODA species delimitation as the assigned species grouped together  
160 along one or both of the first two PCs in most cases (Figure 3a, b). Finally, our SNP data revealed that  
161 individuals within the "hookeri" complex clustered into four major groups (Figure 3a, c): the single  
162 individual from Togo; individuals from western Cameroon; individuals from East Cameroon and  
163 individuals from Gabon.

164 The plotting of these complexes on maps of the sampling region reveals that the delimited species  
165 cluster geographically (Figure 3c, d). In the hookeri complex, the *R. sese* individuals were sampled at a  
166 great distance from each other and *R. gabonica* falls in the middle of the *R. hookeri* distribution range.  
167 Likewise, in the zamiana complex *R. laurentii* and *R. monbottorum* are widespread, overlapping with  
168 other taxa. Many of the delimited species co-occur or are adjacent to one another in Cameroon.

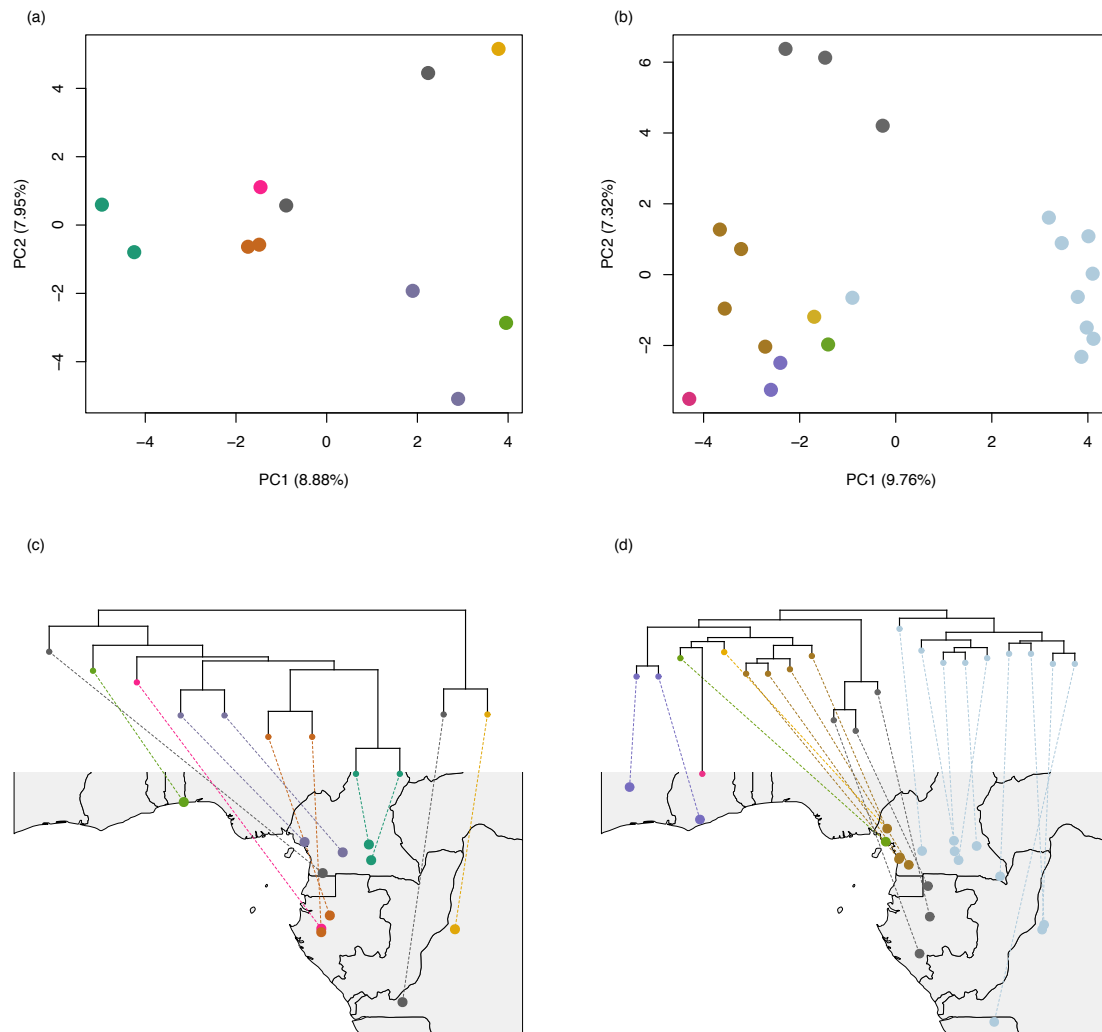

**Figure 3.** (a) Scatterplot of *R. hookeri* complex based on 915 SNPs. (b) Scatterplot of *R. zamiana* complex based on 1627 SNPs. Clades representing the (c) *R. hookeri* and (d) *R. zamiana* complexes were extracted from the ASTRAL (Figure 1) tree and linked to their locations on a map of central Africa. Individuals are coloured by the colours corresponding to SODA species delimitation for  $\alpha = 0.01$  in (a) & (c) and  $\alpha = 0.005$  in (b) & (d). An individual belonging to *R. taedigera* (RA\_TA) is not shown in panels (a) & (c) due to missing data.

### 169 3. Discussion

#### 170 3.1. Synthesizing morphology and molecules: the sections of *Otedoh* reevaluated.

171 Our phylogenomic analyses of *Raphia* provide a novel and overall well supported phylogenetic  
172 framework for this important African genus (Figure 1). Although some of the morphology based  
173 sections of Otedoh [21] were recovered, we also recovered some topological differences (Figure 1).

174 The Moniliformes and Flabellatae are not recovered as monophyletic. The Moniliformes are  
175 split into two clades (Figure 1), while the two Flabellatae species (*Raphia regalis*, *R. australis*) are not  
176 recovered as sister. In all analyses, the acaulescent central African species *Raphia regalis* is recovered  
177 with strong support as sister to the rest of the genus (Figures 1, A1). This species, together with *R.*  
178 *australis*, were placed within the subsection “erectae” [20,21] because the inflorescences were suggested  
179 to be “erect”, in contrast to the rest of the *Raphia* species whose inflorescences are hanging or semi-erect.  
180 Our results do not support this classification, as *R. australis* is recovered as sister to *R. farinifera* (of the  
181 Flabellatae section, Figure 1) and phylogenetically divergent from *R. regalis*. A closer observation in  
182 the field showed that only the inflorescences of *R. australis* are truly erect (Figure 1 N). In contrast, the  
183 inflorescences of *R. regalis* appear erect but are in fact “supported” by the large leaves and not truly  
184 erect (Figure 1 G).

185 The phylogenetic placement of the Moniliformes species *R. matombe* from the Democratic Republic  
186 of the Congo and Angola is different between the two types of analyses. The close relationships between  
187 these two sections is not surprising. The inflorescences, although different in some aspects such as  
188 the clearly racket-shaped partial inflorescences in the section Flabellatae, show certain similarities  
189 not encountered in other *Raphia* species. Both have thin rachillae and the partial inflorescences are  
190 subtended by large showy bracts at least in the younger stages of development. These morphological  
191 similarities thus support the close phylogenetic relationships recovered here between these two  
192 sections.

193 The Obclavate section, composed of the sole species *R. sudanica*, is recovered with strong or  
194 moderate support as sister to the *Raphia* section. This species presents a unique inflorescence structure  
195 within the genus that is reduced and compressed into a cylindrical shape (Figure 1 C), with large bracts  
196 covering the inflorescences almost completely [20,21,27]. In addition, and in contrast to most species, *R.*  
197 *sudanica* thrives within the drier regions of the Sahel. These distinctive characters and its phylogenetic  
198 position support it being placed in its own section, confirming the classification of Otedoh [21].

199 Finally, the two remaining sections, Raphiate and Temulentae, are recovered as monophyletic,  
200 although with varying levels of support from strong to moderate (Figures 1,A1). This also confirms  
201 the classification of Otedoh [21] and the usefulness of partial inflorescence shapes in the classification  
202 of *Raphia* species.

203 Our results suggest that certain sections erected by Otedoh [21] are not monophyletic and need to  
204 be re-evaluated. Differences in phylogenetic relationships between the concatenated and coalescent  
205 approaches have been increasingly reported in the genomic era [28]. Our results were similar to those  
206 in Couvreur et al. [19] where higher bootstrap support were obtained when using the concatenation  
207 approach, despite the coalescent approach highlighting considerable gene tree conflict. Here, we  
208 favour the phylogenetic hypothesis recovered when using the coalescent approach (Figure 1) because  
209 these methods allow gene history to be taken into account [Some theoretical paper + [29]] and provide  
210 an arguably more realistic reconstruction of phylogenetic relationships when using a large number  
211 of independently evolving nuclear markers as used here. Our analyses suggest that we can retain  
212 five sections, only slightly different than those initially defined by Otedoh [21]. Three sections have  
213 been reconstructed in the phylogeny: Obclavatae (with its only species *R. sudanica*), Raphiate and  
214 Temulentae. The latter two sections are internally complicated, and more discussion about the  
215 phylogenetic relationship within sections is provided below. The main problem thus comes from the  
216 Moniliformes and Flabellatae sections, which are not monophyletic. *Raphia regalis* should be placed  
217 in a section of its own, linked to its unique morphology being an acaulescent species with large



218 inflorescences subtended in between large leaves (Figure 1 G). Finally, the last section should regroup  
219 all the other species from both the Moniliformes and Flabellatae. In both cases, we shall refrain here  
220 from erecting a new section because it is out of the scope of this paper.

### 221 3.2. Species delimitation and species complexes

222 Phylogenetic relationships between species are well to weakly resolved depending on the section,  
223 as discussed below.

#### 224 3.2.1. The Moniliformes/Flabellatae section

225 Within the Moniliformes/Flabellatae section species relationships are generally strongly  
226 supported (Figures 1, A1) and several species are recovered as monophyletic (*R. australis*, *R. farinifera*,  
227 *R. matombe*) while species limits in others are less clear (*R. textilis*, *R. vinifera*).

228 Once again, there is a conflict between the concatenated and coalescent analyses. *Raphia textilis* is  
229 recovered as monophyletic with strong support (Figure 1). Nevertheless, there is little doubt that these  
230 samples represent the same species as they are morphologically similar. This is also confirmed by the  
231 species delimitation analysis at both levels of  $\alpha$  (Figure 1,A2).

232 Another result recovered is the close relationship of the two montane species of *Raphia*: *R.*  
233 *ruwenzorica* been included within *R. vinifera*. Both species occupy a similar ecological and altitudinal  
234 range, despite being geographically separated by ca. 2,500 km. *Raphia vinifera*, which has long  
235 been mis-identified with *R. mambillensis* (now a synonym of *R. vinifera* [30]), is very common in the  
236 Cameroon Volcanic Line (CVL) in Cameroon and Nigeria, where it grows between 1,200 and 2,000m in  
237 grassland/open vegetation and is very abundant along streams and rivers [10,30]. *Raphia ruwenzorica*  
238 occurs between 800 and 1,500 m in the Albertine rift region in eastern Democratic Republic of the  
239 Congo and Burundi and has been suggested to grow in “savanna country” along valleys [20,21,31,32].  
240 In addition, both species present similar partial inflorescence that is flat and racket shaped. However,  
241 both species differ markedly in their port with *R. ruwenzorica* reported to have a distinct tall trunk  
242 reaching up to 15 m [10,21,31] whereas as *R. vinifera* is acaulescent or with a short trunk (less than 1 m;  
243 [30]). This, in addition to the 2,500+ km separating these species, suggests that they could be recognized  
244 as distinct, despite our results. Interestingly, an intraspecific CVL / Albertine rift disjunction has been  
245 documented in different taxa such as *Isolona congolana* (Annonaceae, [33]) and *Prunus africana* [34].

246 *Raphia farinifera* is the most widespread species of *Raphia*, occurring from West Africa to East Africa  
247 and Madagascar, and has also been reported from the Republic of Congo and Angola [23,32,35–40].  
248 Our limited (3) but widespread sampling (West Africa and Madagascar) of individuals clustered  
249 together with maximum support (Figures 1,A1). However, our species delimitation analysis suggests  
250 that the Malagasy individual (R41\_T15) is a different species (Figure 1). *Raphia* individuals from  
251 Madagascar were initially described as a different species (*R. ruffia*) [22] and the name subsequently  
252 synonymized with *R. farinifera* [32]. In Madagascar, *Raphia* is widely used (one of the most useful  
253 palms) and, today at least, not found in natural forests across the island [41]. This has led to the  
254 hypothesis that *Raphia* was introduced 1,500 years ago during the first wave of human colonization of  
255 the island [41]. However, Beccari [22] (p. 53) writes that the Malagasy species “prefers the vicinity of  
256 the sea where it forms whole forests in swampy places especially on the East coast” suggesting that  
257 it did at one point in time occur naturally and abundantly. Our sampling is not extensive enough to  
258 answer this question conclusively, but our results suggest that Malagasy individuals might indeed  
259 belong to a different species (*R. ruffia*) as concluded by Beccari [22] (p. 53). Finally, *R. farinifera* is  
260 recovered as sister to *R. australis*, a relationship already suggested based on morphology [32].

#### 261 3.2.2. The Raphiate section

262 One of the most complex and least understood sections is the Raphiate section, which contains  
263 seven to eight species. Some of these species are poorly known and rarely collected, sometimes only  
264 known from a single poor quality specimen (*R. mannii*; *R. longiflora*; *R. africana*). In our study we were

265 not able to sample *R. mannii* and *R. longiflora*, thus our results for this section are still incomplete.  
266 Indeed, these species are morphologically similar [19], having clustering stems covered with straight  
267 fibres in addition to having semi-erect inflorescences when young (Figure 1 I), a unique character  
268 for the genus. Nevertheless, it is hard morphologically to consider these two species as conspecific.  
269 Indeed, the shape of the rachillae is quite different between these species (Figure 1 J,K). *Raphia laurentii*  
270 is characterized by rather thick rachillae covered by numerous tightly packed rachis bracts leading to  
271 an overall digitate aspect of the rachillae (Figure 1 J). In *R. monbuttorum* the rachillae are thinner and  
272 the rachis' bracts are less tightly packed around the rachillae (Figure 1 K). These differences appear to  
273 be consistent and provide useful identification characters [19].

274 *Raphia zamiana* was recently described [7]. Our broad sampling of this species, however, recovers  
275 *R. zamiana* as polyphyletic, with individuals grouping into two main clades, flagged as two different  
276 species by our species delimitation analysis (Figures 1, A2). Interestingly, these two species are  
277 geographically distinct, with one clade sampled across Gabon and one across Cameroon (Figure 3b, d),  
278 the latter containing the type of *R. zamiana*. The Gabon cluster is particularly well supported in both  
279 analyses. At this point, however, it is hard to pin point clear morphological characters differentiating  
280 these two clusters, as extensive field observations have yet to distinguish them properly.

281 We sampled two individuals of the Neotropical species *R. taedigera*, both from Brazil. As expected  
282 from the morphology of the partial inflorescence [21], this species grouped within the Raphiate section  
283 (Figure 1). Both individuals clustered together with strong support, and, in turn, were recovered as  
284 sister to either *R. africana* (Figure 1) or *R. palma-pinus* (Figure A1, in both cases with weak support  
285 values. Otedoh [21], following certain authors [23,42] suggested that *R. taedigera* was very close  
286 morphologically to a species identified as *R. vinifera*. However, early on the taxonomic concept of  
287 *R. vinifera* has been confusing, erroneously mistaking this species for a Raphiate type species [23,42].  
288 Mogue Kamga et al. [30] clarified the situation showing that the name *R. vinifera* refers to a Flabelatae  
289 species mainly occurring in the CVL. To date, it remains unclear to what species Otedoh and others  
290 [21,23,42] were referring to when invoking *R. vinifera*.

291 Despite these taxonomic confusions, our results provide some results as to the origin of *R. taedigera*.  
292 It has been hypothesised that this species originated as a result of vicariance during the breakup of  
293 Gondwana [4]. If this were the case we would have expected that *R. taedigera* to be sister to the African  
294 species. The deeply nested position of *R. taedigera* within the genus does not support this hypothesis.  
295 Instead, our results lend some support to the conclusion of Otedoh [10] who suggested that *R. taedigera*  
296 did not show any "primitive" characters within the genus. Otedoh went further to suggest that *R.*  
297 *taedigera* was the result of a recent introduction in South and Central America during the slave trade  
298 some 400 years ago [10,11]. Our species delimitation results suggest, however, that *R. taedigera* is a  
299 valid species (Figure 1), at least based on the individuals sampled from Brazil. Finally, Otedoh also  
300 suggested the presence of *R. taedigera* in coastal west-central Africa [10,11]. However, to date we have  
301 not been able to locate this species in African collections and this hypothesis remains doubtful [1]. Our  
302 phylogenetic analyses suggest that *R. taedigera* is genetically quite different from other *Raphia* species  
303 (Figure A2) supporting the hypothesis that it must have dispersed to the Neotropics more than 400  
304 years ago. This would fit with paleoecological data from Nicaragua documenting *R. taedigera* pollen  
305 over the last 2,500 years [9]. A more detailed sampling of *R. taedigera* from the Neotropics together  
306 with a dated molecular phylogeny approach will provide a better understanding of the biogeographic  
307 history of this interesting trans-Atlantic disjunction.

### 308 3.2.3. The Temulentae section

309 This section contains the species referred to as the "wine" palms [20,21] with three species  
310 previously included in this section (*R. hookeri*, *R. rostrata*, *R. sese*), all of which are sampled here.  
311 In addition, our results show that the newly described species, *R. gabonica* [7], is also part of the  
312 Temulentae section. This was not clear at the time of the publication as the partial inflorescence  
313 suggested a possible relationship with the Moniliformes section [7]. Overall, species identified based

314 on morphology clustered together (e.g. *R. gabonica*, *R. sese*) with strong or low support. Nevertheless,  
315 all four species show a very close phylogenetic proximity, suggesting that this section could be regarded  
316 as one large species complex. Indeed, depending on the level of stringency, our species delimitation  
317 analysis recovered either seven distinct species or one single species (Figures 1, A2). It is important to  
318 note that changing levels of  $\alpha$  did not impact species delimitation in the other sections. Morphologically,  
319 however, these species are different and can easily be identified in the field, which is partly supported  
320 by our phylogenetic analysis. For example, *R. gabonica* resembles *R. hookeri* in the clearly visible single  
321 stem covered with characteristic curly fibers, but differs markedly by being a *terra firma* low-density  
322 species with thin (Moniliformes-like) and densely packed rachillae. In contrast, *R. hookeri* is a swampy  
323 species, growing in large, monodominant stands with robust and more evenly-spaced rachillae [7,19].  
324 In the same way, *R. rostrata* is characterized by a small but clustering stem with curly mixed with  
325 straight hanging fibers and occurs along rivers with strong currents [19].

326 *Raphia hookeri* is recovered here as polyphyletic, possibly including four different cryptic species.  
327 This is one of the most important, abundant and widespread *Raphia* species and its overall morphology  
328 is rather constant across its range. However, individuals appear to be geographically structured like in  
329 *R. zamiana* (see above). Interestingly, this mirrors patterns of genetic structure recovered across a wide  
330 range of central African plant species [43,44], including *R. zamiana*.

#### 331 4. Conclusions

332 Our results provide a new step forward in understanding the phylogenetic relationships and  
333 taxonomy within this major African palm genus. We show that the morphological sections based  
334 on partial inflorescence shape defined by Otedoh [21] are relatively robust overall, even though two  
335 sections will need to be grouped and redefined morphologically. Our results also uncover important  
336 species delimitation problems defined here as species complexes (*R. hookeri*, *R. zamiana*) that must  
337 be solved if we are to have a thorough understanding of *Raphia* systematics. Given the economic  
338 and ecological importance of *R. hookeri*, clarifying its species delimitation will be important in the  
339 future. Different approaches could rely on more in-depth population level studies using more variable  
340 markers (e.g. microsatellites) combined with detailed morphometric measurements as has been done  
341 in other African tree species [45]. We show here that the Heyduk et al. bait kit [26] is useful for  
342 understanding relationships within the *Raphia* genus and between species as in other groups [? ],  
343 although it appears to be limited for untangling species complexes. Resolving relationships within  
344 *Raphia* will thus rely on more data, including increased intra-species sampling, detailed morphological  
345 studies in certain species and larger baiting kits e.g. [46].

#### 346 5. Materials and Methods

##### 347 5.1. Species sampling, library preparation and DNA sequencing

348 We sampled a total of 56 individuals (see A1 for details) representing 18 out of the 21 species  
349 accepted to date [7,19] and representing all sections described by Otedoh [21]. In order to collect  
350 proper material for sequencing, several field trips were undertaken across several African countries  
351 including Ivory Coast, Ghana, Gabon, Cameroon, Angola and the Democratic Republic of the  
352 Congo between 2012 and 2017. We were not able to access material from three accepted species: *R.*  
353 *gentiliana*, *R. mannii* and *R. longiflora*. We sampled two to seven individuals per species in order to  
354 test for monophyly. However, only a single specimen was available for *R. ruwenzorica*. Finally, we  
355 sampled four species within Calamoideae as outgroups: *Eremospatha cabrae*, *Eremospatha quiquecostulata*,  
356 *Laccosperma cristalensis* and *Mauritiella armata* following [25,47]. We extracted DNA from leaves dried  
357 in silicagel, except for one individual of *R. taedigera* and the only individual of *R. ruwenzorica* for which  
358 DNA was extracted from herbarium dried material.

359 Methods for DNA extraction, preparation of sequencing libraries, hybridization, Illumina  
360 MiSeq DNA sequencing and read cleaning followed [19]. In brief, barcoded Illumina libraries were

361 constructed based on a modified protocol of Rohland and Reich [48]. We hybridized DNA to defined  
362 exons using the palm-specific nuclear baiting kit of Heyduk et al. [26]. This kit allows to sequence  
363 exons from 176 nuclear genes across the palm family.

### 364 5.2. Contig assembly and multi-sequence alignment

365 We used HybPiper (v1.2) [49] to process our cleaned reads (following [19]) to obtain sequences  
366 corresponding to the target exons plus associated intronic sequence data (referred to as supercontigs).  
367 We aligned each set of supercontigs using MAFFT (v7.305) [50] with the `-auto` option and cleaned these  
368 alignments with GBLOCKS (v0.91b) [51] using the default parameters and all allowed gap positions.

369 To identify a suitable set of loci for phylogenetic inference we selected only those supercontigs  
370 that had 75% of their exon length reconstructed in at least 25% of individuals (referred to as 75/25).  
371 We used only those loci in which at least 75% of the exon length was recovered because the use of  
372 fragmented sequences is known to increase gene tree error, whereas the number of individuals has  
373 little effect as long as the gene tree is accurate [52].

#### 374 5.2.1. Paralog identification

375 HybPiper flags potential paralogs when multiple contigs are discovered mapping well to a  
376 single reference sequence. We ran `hybpiper` on the 837 exons that made up the baiting kit [26],  
377 identified flagged loci and constructed exon trees using RAxML (v8.2.9) [53]. We examined each tree to  
378 determine whether putative paralogs formed a species clade. When sequences concerning more than  
379 three individuals were flagged for a locus, we examined whether the 'main' and alternative sequences  
380 formed separate clades. If so this locus was classified as a paralog and discarded from the dataset. For  
381 each gene, we then calculated at the proportion of exons that we confirmed as paralogs after inspection.  
382 If this proportion was  $< 50\%$  we removed the entire gene from our analyses.

### 383 5.3. Coalescent phylogenetic inference

384 Individual gene trees were constructed with 100 bootstraps and the GTRGAMMA model using  
385 RAxML (v8.2.9) [53] (option `"-f a"`). If after inference, branches had bootstrap support values  $> 10$  they  
386 were collapsed using the program `nw_ed` [54] because this approach has been shown to improve the  
387 accuracy of ASTRAL [29]. We used the selected 75/25 gene trees as our input to run ASTRAL-III  
388 (v5.5.11) [29] using the default options.

### 389 5.4. Species delimitation

390 After constructing our ASTRAL tree we used the associated approach SODA [55]. Simulations  
391 using this approach have shown it to be of similar accuracy or more accurate [55] than other popular  
392 species delimitation methods such as BPP [56] at a fraction of the computational cost. SODA uses  
393 frequencies of quartet topologies to determine if each branch in a guide tree inferred from gene trees  
394 (i.e. the ASTRAL tree from above) is likely to have a positive length. This identifies where in the tree  
395 coalescence is random, and where it is non-random. It then uses the results to infer a new, extended  
396 species tree that defines boundaries among species. We used two cut-off values of  $\alpha$  (confidence level):  
397 0.01 and 0.005.

### 398 5.5. Maximum-likelihood phylogenetic inference

399 After suitable loci were identified we filled any missing individuals in each alignment with  
400 an empty sequence. We then concatenated all aligned loci using the `pxcat` function in the program  
401 `phyx` [57]. We used IQ-TREE (v1.6.8; [58]) to infer a maximum likelihood tree of all individuals. We  
402 partitioned our dataset so that each supercontig had a separate substitution model and used the  
403 following options when running the program: `"-m MFP+MERGE -rcluster 10 -bb 1000 -alrt 1000"`. We  
404 selected the optimal partitioning scheme using ModelFinder [59], choosing the best model based on

405 Bayesian Information Criterion (BIC) score and merging genes until model fit stopped increasing. We  
406 also used rcluster [60] to decrease computational load. We made use of the ultrafast bootstrapping  
407 ([61]; 1000 replicates) and the SH-like approximate likelihood ratio test ([62]; 1000 replicates) to assess  
408 branch support in the tree.

#### 409 5.6. SNP calling

410 To call SNPs we first used SeCaPr (v1.1.4; [63]) to build a pseudoreference. After filtering out  
411 low coverage and paralogous loci, consensus sequences are built and combined to form a reference  
412 file that is closer to the study group than the original, and will recover more data. We mapped our  
413 cleaned, paired reads to this new, dataset-specific reference using BWA (v0.7.12; [64]). Duplicates were  
414 removed and we called SNPs using the program HaplotypeCaller in GATK (v4.0; [65]). We applied  
415 thresholds to mapping quality (>40%) depth (>25), quality by depth (>2), minimum quality across all  
416 individuals (>10) and minor allele frequency (>0.01) to filter SNPs using bcftools (v1.8; [66]). We kept  
417 only biallelic SNPs and excluded monomorphic sites.

#### 418 5.7. Genetic clustering

419 We performed Discriminant Analysis of Principal Components (DAPC) [67] to identify genetic  
420 clusters in two species complexes of *Raphia*. We used the function *find.clusters* in the R package  
421 ‘adegenet’ [68] to infer the number of clusters using successive K-means with 100,000 iterations per  
422 value of k up to k = 20. We used BIC to identify the best-fitting number of clusters. We then used the  
423 function *dapc* [67] to define the diversity among the clusters identified. We chose the optimum number  
424 of axes to use with the function *optim.a.score*.

425 **Author Contributions:** Conceptualization, AJH, TLPC and BS; methodology KB and AH; validation AJH, KB  
426 and MKS; formal analysis AJH; resources LT, FS, CDB, AZ, AA, MKS, TLPC; data curation KB, AJH and MKS;  
427 writing–original draft preparation AJH and TLPC; writing–review and editing, TO COMPLETE; supervision,  
428 TLPC and BS; project administration, TLPC; funding acquisition, TLPC. All authors have read and agreed to the  
429 published version of the manuscript.

430 **Funding:** This study was supported by Agropolis Fondation (RAPHIA project) under the reference ID 1403-026  
431 through the «Investissements d’avenir» program (ANR-10-LABX-0001-01; ISITE MUSE: ANR-16-IDEX-0006)  
432 and Agence Nationale de la Recherche (ANR-15- CE02-0002-01), both to TLPC. This work was also part of the  
433 PALM-A-GOV (project number: 1702-007) project to TLPC, publicly funded through the ANR (the French National  
434 Research Agency) under the "Investissements d’avenir" program with the reference ANR-10-LABX001-01 Labex  
435 Agro and coordinated by Agropolis Fondation within the I-SITE MUSE (ANR-16-IDEX-0006). AZ is funded by  
436 iDiv via the German Research Foundation (DFG FZT 118), specifically through sDiv, the Synthesis Centre of iDiv.  
437 C.D.B. is funded by the Swedish Research Council (2017-04980). A.A. is funded by the Swedish Research Council,  
438 the Swedish Foundation for Strategic Research, the Knut and Alice Wallenberg Foundation and the Royal Botanic  
439 Gardens, Kew. ADD funding others here

440 **Acknowledgments:** The authors acknowledge the IRD itrop HPC (South Green Platform) at IRD Montpellier  
441 for providing HPC resources that have contributed to the research results reported within this paper. We are  
442 grateful to the Centre National de la Recherche Scientifique et Technique (CENAREST) in Gabon and the Agence  
443 National des Parques Nationaux (ANPN) for delivering the necessary research permits for our field work in  
444 Gabon in 2015 and 2016 (permits AR0020/16; AR0036/15 (CENAREST) and AE16014 (ANPN)). Prof. Paul Henri  
445 Bourobou Bourobou is thanked for his assistance in obtaining these research permits. Fieldwork in Cameroon was  
446 undertaken under the “accord cadre de cooperation” between the IRD and Ministère de la Recherche Scientifique  
447 et Technique (MINRESI). TU Dresden maintains a Memorandum of Understanding with the Instituto Nacional  
448 da Biodiversidade e Áreas de Conservação (INBAC) of the Ministério do Ambiente da República de Angola  
449 that includes collection and export permits.. FOR THOSE HOW HAVE PERMITS PLEASE ADD OR SEND TO  
450 THOMAS

451 **Conflicts of Interest:** The authors declare no conflict of interest.

#### 452 Abbreviations

453 The following abbreviations are used in this manuscript:

454

CVL Cameroon Volcanic Line

455 SNP Single Nucleotide Polymorphism

PC Principal Components Analysis

456 **Appendix A Supplementary Tables**



457 Appendix B Supplementary Figures

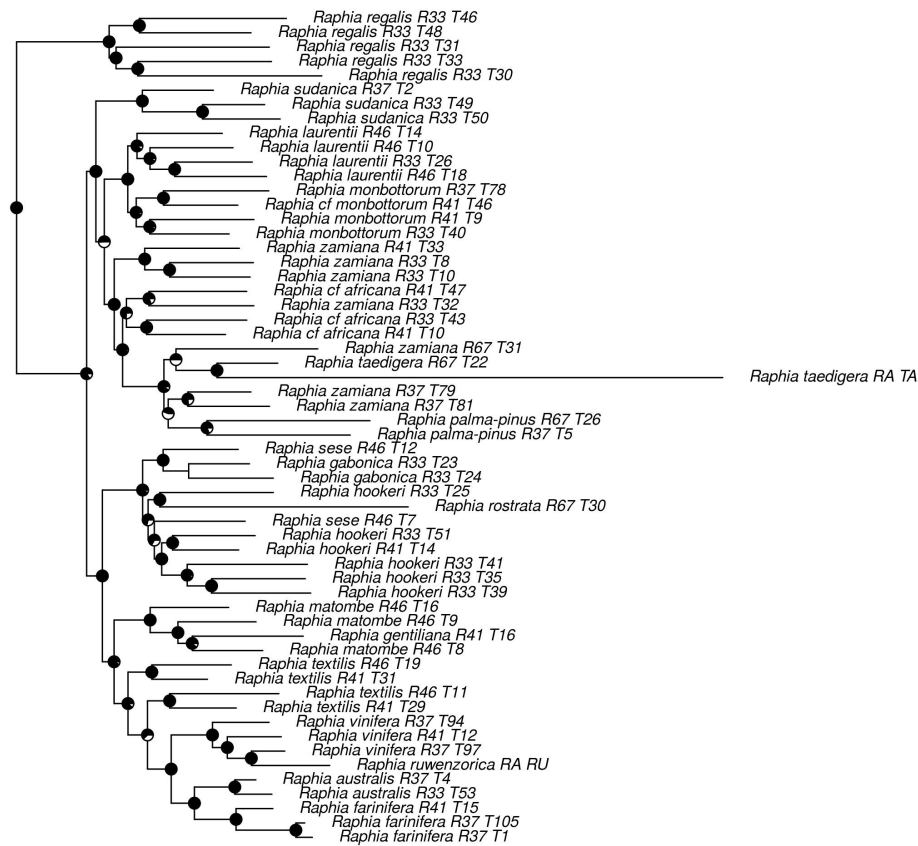

**Figure A1.** IQTREE *Raphia* inferred using 162kb of sequence data. Values for ultrafast bootstrap support are depicted on nodes.



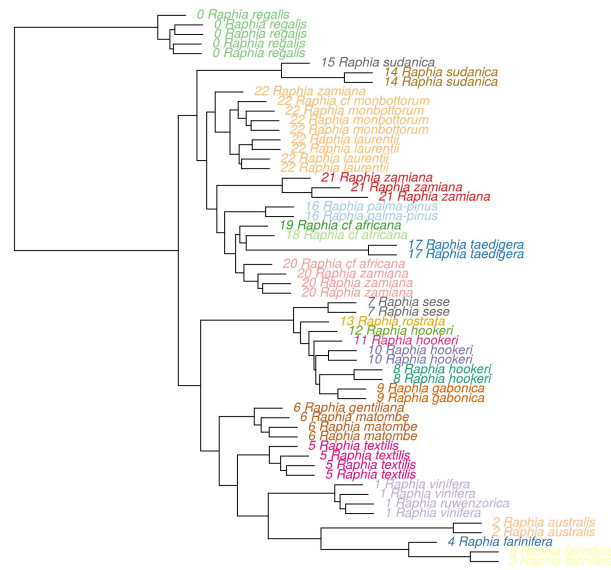

**Figure A2.** ASTRAL tree of *Raphia* including inferred branch lengths (except terminal branch lengths) and tip labels coloured with species delimitation as inferred with SODA ( $\alpha = 0.01$ ).

## References

1. Dransfield, J.; Uhl, N.; Asmussen, C.B.; Baker, W.; Harley, M.M.; Lewis, C.E. *Genera Palmarum: The evolution and classification of palms*; Kew Publishing: Kew, 2008.
2. Stauffer, F.W.; Ouattara, D.N.; Roguet, D.; da Giau, S.; Michon, L.; Bakayoko, A.; Ekpe, P. An update to the African palms (Arecaceae) floristic and taxonomic knowledge, with emphasis on the West African region. *Webbia* **2017**, *72*, 1–14. doi:10.1080/00837792.2017.1313381.
3. Cosiaux, A.; Gardiner, L.M.; Stauffer, F.W.; Bachman, S.P.; Sonké, B.; Baker, W.J.; Couvreur, T.L.P. Low extinction risk for an important plant resource: Conservation assessments of continental African palms (Arecaceae/Palmae). *Biological Conservation* **2018**, *221*, 323–333. doi:10.1016/j.biocon.2018.02.025.
4. Moore, H. Palms in the tropical forest ecosystems of Africa and South America. In *Tropical forest ecosystems of Africa and South America: a comparative review*; Meggers, B.; Ayensu, E.; Duckworth, W., Eds.; Smithsonian Institution Press: Washington DC, 1973; pp. 63–88.
5. Couvreur, T. Odd man out: Why are there fewer plant species in African rain forests? *Plant Systematics and Evolution* **2015**, *301*, 1299–1313. doi:10.1007/s00606-014-1180-z.
6. Dransfield, J. The palms of Africa and their relationships. In *Modern systematic studies in African botany*; Goldblatt, P.; Lowry, P.P., Eds.; Missouri Botanical Garden Press, 1988; pp. 95–103.
7. Mogue Kamga, S.; Niangadouma, R.; Stauffer, F.W.; Sonké, B.; Couvreur, T.L.P. Two new species of *Raphia* (Palmae/Arecaceae) from Cameroon and Gabon. *PhytoKeys* **2018**, *111*, 17–30. doi:10.3897/phytokeys.111.27175.
8. Urquhart, G.R. Long-term Persistence of *Raphia taedigera* Mart. Swamps in Nicaragua1. *Biotropica* **1999**, *31*, 565–569. doi:10.1111/j.1744-7429.1999.tb00403.x.
9. Urquhart, G.R. Paleoeological evidence of *Raphia* in the Pre-Columbian Neotropics. *Journal of Tropical Ecology* **1997**, *13*, 783–792. doi:10.1017/S0266467400010993.
10. Otedoh, M. Systematic Studies in *Raphia* Palms. Doctoral Thesis, University of Reading, UK., 1976.
11. Otedoh, M.O. The African origin of *Raphia taedigera* – Palmae. *J. Niger. Inst. Oil Palm Res* **1977**, *42*, 11–16.
12. Kamga, M.; Brokamp, G.; Cosiaux, A.; Awono, A.; Fürniss, S.; Barfod, A.S.; Muafor, F.J.; Le Gall, P.; Sonké, B.; Couvreur, T. Use and cultural significance of *Raphia* palms. *Economic Botany*.

- 485 13. Lautenschläger, T.; Neinhuis, C., Eds. *Riquezas naturais de Uíge – uma breve introdução sobre o estado atual, a*  
486 *utilização, a ameaça e a preservação da biodiversidade*, technische universität dresden ed.; 2014.
- 487 14. Obahiagbon, F.I. A review of the origin, morphology, cultivation, economic products, health and  
488 physiological implications of raphia palm. *African Journal of Food Science* **2009**, *3*, 447–453. 00011.
- 489 15. Couvreur, T.L.P.; Fumtim, J. *A l’Echelle du Raphia / On Raphia and Man*, 2017.
- 490 16. Profizi, J.P. Swampy Area Transformations by Exploitation of *Raphia hookeri* (Arecaceae) in Southern  
491 Benin (West Africa). *Human Ecology* **1988**, *16*, 87–94.
- 492 17. Dargie, G.C.; Lewis, S.L.; Lawson, I.T.; Mitchard, E.T.A.; Page, S.E.; Bocko, Y.E.; Ifo, S.A. Age,  
493 extent and carbon storage of the central Congo Basin peatland complex. *Nature* **2017**, *542*, 86–90.  
494 doi:10.1038/nature21048.
- 495 18. Rainey, H.J.; Iyenguet, F.C.; Malanda, G.A.F.; Madzoké, B.; Santos, D.D.; Stokes, E.J.; Maisels, F.; Strindberg,  
496 S. Survey of *Raphia* swamp forest, Republic of Congo, indicates high densities of Critically Endangered  
497 western lowland gorillas *Gorilla gorilla gorilla*. *Oryx* **2010**, *44*, 124–132. doi:10.1017/S003060530999010X.
- 498 19. Couvreur, T.L.P.; Helmstetter, A.J.; Koenen, E.J.M.; Bethune, K.; Brandão, R.D.; Little, S.A.; Sauquet, H.;  
499 Erkens, R.H.J. Phylogenomics of the Major Tropical Plant Family Annonaceae Using Targeted Enrichment  
500 of Nuclear Genes. *Frontiers in Plant Science* **2019**, *9*, 1941. doi:10.3389/fpls.2018.01941.
- 501 20. Tuley, P. *The palms of Africa*; The Tendrine Press, Trendrine Press: Zennor, 1995.
- 502 21. Otedoh, M.O. A revision of the genus *Raphia* Beauv. (Palmae). *J. Niger. Inst. Oil Palm Res* **1982**, *6*, 145–189.  
503 00011.
- 504 22. Beccari, O. Studio monografico del genere "Raphia". *Webbia* **1910**, *3*, 37–130.  
505 doi:10.1080/00837792.1910.10669558.
- 506 23. Russell, T.A. The *Raphia* Palms of West Africa. *Kew Bulletin* **1965**, *19*, 173–196. doi:10.2307/4108027.
- 507 24. Tuley, P.; Russell, T.A. The *Raphia* palms reviewed. *Nigerian Field* **1966**, *31*, 54–65.
- 508 25. Baker, W.J.; Dransfield, J.; Hedderson, T.A. Phylogeny, character evolution, and a new classification of the  
509 calamoid palms. *Systematic Botany* **2000**, *25*, 297–322.
- 510 26. Heyduk, K.; Trapnell, D.W.; Barrett, C.F.; Leebens-Mack, J. Phylogenomic analyses of species relationships  
511 in the genus *Sabal* (Arecaceae) using targeted sequence capture. *Biological Journal of the Linnean Society*  
512 **2016**, *117*, 106–120. doi:10.1111/bij.12551.
- 513 27. Ouattara, D.N.; Stauffer, F.W.; Bakayoko, A. Lectotypification de *Raphia sudanica* A. Chev.(Arecaceae,  
514 Calamoideae), et commentaires sur la biologie et la conservation de l’espèce. *Adansonia* **2014**, *36*, 53–61.  
515 00002.
- 516 28. Liu, X.; Fu, Y.X. Exploring population size changes using SNP frequency spectra. *Nature Genetics* **2015**,  
517 *47*, 555–559. doi:10.1038/ng.3254.
- 518 29. Zhang, C.; Sayyari, E.; Mirarab, S. ASTRAL-III: Increased scalability and impacts of contracting low support  
519 branches. *Lecture Notes in Computer Science (including subseries Lecture Notes in Artificial Intelligence*  
520 *and Lecture Notes in Bioinformatics)*, 2017, Vol. 10562 LNBI, pp. 53–75. doi:10.1007/978-3-319-67979-2\_4.
- 521 30. Mogue Kamga, S.; Sonké, B.; Couvreur, T.L.P. *Raphia vinifera* (Arecaceae; Calamoideae): Misidentified for  
522 far too long. *Biodiversity Data Journal* **2019**, *7*, e37757. doi:10.3897/BDJ.7.e37757.
- 523 31. Robyns, W.; Tournay, R. Monocotylées nouvelles ou critiques de la région du Parc National Albert (Congo  
524 belge). *Bulletin du Jardin botanique de l’État a Bruxelles* **1955**, *25*, 239–260. doi:10.2307/3667057.
- 525 32. Stauffer, F.W.; Ouattara, D.; Stork, A.L. Palmae. In *Tropical African Flowering Plants: Monocotyledons 2*;  
526 Lebrun, J.P.; Stork, A.L., Eds.; Conservatoire et Jardin botaniques de la Ville de Genève, Switzerland.:  
527 Genève, 2014; Vol. 8, pp. 326–354.
- 528 33. Couvreur, T. Monograph of the syncarpous African genera *Isolona* and *Monodora* (Annonaceae). *Systematic*  
529 *Botany Monographs* **2009**, *87*, 1–150.
- 530 34. Kadu, C.a.C.; Schueler, S.; Konrad, H.; Muluvi, G.M.M.; Eyog-Matig, O.; Muchugi, A.; Williams, V.L.;  
531 Ramamonjisoa, L.; Kapinga, C.; Foahom, B.; Katsvanga, C.; Hafashimana, D.; Obama, C.; Geburek, T.  
532 Phylogeography of the Afromontane *Prunus africana* reveals a former migration corridor between East  
533 and West African highlands. *Molecular Ecology* **2011**, *20*, 165–178. doi:10.1111/j.1365-294X.2010.04931.x.
- 534 35. Dale, I.R. Palms of Kenya. *The Journal of the East Africa and Uganda Natural History Society* **1938**, *23*, 183–186.
- 535 36. Russell, T.A. Palmae. In *Flora of West Tropical Africa*, 2 ed.; Hutchinson, J.; Dalziel, J.M.; Hepper, F., Eds.;  
536 Crown Agents for Oversea Governments and Administrations: London, 1968; Vol. 3, pp. 159–169.

- 537 37. Dransfield, J. *Palmae*. In *Flora of Tropical East Africa*; Polhill, R., Ed.; A.A. Balkema: Rotterdam, 1986; pp.  
538 1–58.
- 539 38. Dransfield, J.; Beentje, H.J. *The palms of Madagascar*; Royal Botanic Gardens and International Palm Society:  
540 Kew, 1995. 00134.
- 541 39. Baker, W.; Smith, G.F. *Palmae*. In *Plants of Angola*; Figueiredo, E., Ed.; Number 23 in *Strelitzia*, 2008; pp.  
542 172–173.
- 543 40. Faye, A.; Moutsamboté, J.; Couvreur, T. Palms in southern Republic of Congo. *PALMS* **2016**, *59*, 181–190.
- 544 41. Dransfield, J.; Rakotoarinivo, M. The biogeography of Madagascar palms. In *The Biology of Island Floras*,  
545 Cambridge University Press ed.; Bramwell, D.; Caujapé-Castells, J., Eds.; 2011; pp. 179–196.
- 546 42. Mann, G.; Wendland, H. On the Palms of Western Tropical Africa. *Transactions of the Linnean Society of*  
547 *London* **1864**, *24*, 421–440. doi:10.1111/j.1096-3642.1863.tb00165.x.
- 548 43. Hardy, O.J.; Born, C.; Budde, K.; Dainou, K.; Dauby, G.; Duminil, J.Ô.; Ewédjé, E.E.B.; Gomez, C.; Heuertz,  
549 M.; Koffi, G.K.; Lowe, A.J.; Micheneau, C.; Ndiade-Bourobou, D.; Piñeiro, R.; Poncet, V. Comparative  
550 phylogeography of African rain forest trees: A review of genetic signatures of vegetation history in the  
551 Guineo-Congolian region. *Comptes Rendus - Geoscience* **2013**, *345*, 284–296. doi:10.1016/j.crte.2013.05.001.
- 552 44. Helmstetter, A.J.; Amoussou, B.E.N.; Bethune, K.; Kandem, N.G.; Kakaï, R.G.; Sonké, B.; Couvreur, T.L.P.  
553 Phylogenomic data reveal how a climatic inversion and glacial refugia shape patterns of diversity in an  
554 African rain forest tree species. *bioRxiv* **2019**, p. 807727. doi:10.1101/807727.
- 555 45. Lissambou, B.J.; Couvreur, T.L.P.; Atteke, C.; Stévert, T.; Piñeiro, R.; Dauby, G.; Monthe, F.K.; Ikabanga,  
556 D.U.; Sonké, B.; M'batchi, B.; Hardy, O.J. Species delimitation in the genus *Greenwayodendron* based on  
557 morphological and genetic markers reveals new species. *TAXON* **2019**, *68*, 442–454. doi:10.1002/tax.12064.
- 558 46. Loiseau, O.; Olivares, I.; Paris, M.; de La Harpe, M.; Weigand, A.; Koubínová, D.; Rolland, J.; Bacon,  
559 C.D.; Balslev, H.; Borchsenius, F.; Cano, A.; Couvreur, T.L.P.; Delnatte, C.; Fardin, F.; Gayot, M.; Mejía, F.;  
560 Mota-Machado, T.; Perret, M.; Roncal, J.; Sanin, M.J.; Stauffer, F.; Lexer, C.; Kessler, M.; Salamin, N. Targeted  
561 Capture of Hundreds of Nuclear Genes Unravels Phylogenetic Relationships of the Diverse Neotropical  
562 Palm Tribe Geonomateae. *Frontiers in Plant Science* **2019**, *10*. doi:10.3389/fpls.2019.00864.
- 563 47. Baker, W.J.; Savolainen, V.; Asmussen-Lange, C.B.; Chase, M.W.; Dransfield, J.; Forest, F.; Harley, M.M.; Uhl,  
564 N.W.; Wilkinson, M. Complete generic-level phylogenetic analyses of palms (Arecaceae) with comparisons  
565 of supertree and supermatrix approaches. *Systematic Biology* **2009**, *58*, 240–256. doi:10.1093/sysbio/syp021.
- 566 48. Rohland, N.; Reich, D. Cost-effective, high-throughput DNA sequencing libraries for multiplexed target  
567 capture. *Genome Research* **2012**, *22*, 939–946. doi:10.1101/gr.128124.111.
- 568 49. Johnson, M.G.; Gardner, E.M.; Liu, Y.; Medina, R.; Goffinet, B.; Shaw, A.J.; Zerega, N.J.C.; Wickett, N.J.  
569 HybPiper: Extracting Coding Sequence and Introns for Phylogenetics from High-Throughput Sequencing  
570 Reads Using Target Enrichment. *Applications in Plant Sciences* **2016**, *4*, 1600016. doi:10.3732/apps.1600016.
- 571 50. Katoh, K.; Standley, D.M. MAFFT multiple sequence alignment software version 7: Improvements in  
572 performance and usability. *Molecular Biology and Evolution* **2013**, *30*, 772–780. doi:10.1093/molbev/mst010.
- 573 51. Castresana, J. Selection of conserved blocks from multiple alignments for their use in phylogenetic analysis.  
574 *Molecular Biology and Evolution* **2000**, *17*, 540–552. doi:10.1093/oxfordjournals.molbev.a026334.
- 575 52. Sayyari, E.; Mirarab, S. Fast Coalescent-Based Computation of Local Branch Support from  
576 Quartet Frequencies. *Molecular biology and evolution* **2016**, *33*, 1654–1668, [1601.07019].  
577 doi:10.1093/molbev/msw079.
- 578 53. Stamatakis, A. RAxML version 8: A tool for phylogenetic analysis and post-analysis of  
579 large phylogenies. *Bioinformatics* **2014**, *30*, 1312–1313, [arXiv:10.1093/bioinformatics/btu033].  
580 doi:10.1093/bioinformatics/btu033.
- 581 54. Junier, T.; Zdobnov, E.M. The Newick utilities: high-throughput phylogenetic tree processing in the UNIX  
582 shell. *Bioinformatics* **2010**, *26*, 1669–1670. doi:10.1093/bioinformatics/btq243.
- 583 55. Rabiee, M.; Mirarab, S. SODA: Multi-locus species delimitation using quartet frequencies. *bioRxiv* **2019**, p.  
584 869396. doi:10.1101/869396.
- 585 56. Yang, Z. The BPP program for species tree estimation and species delimitation. *Current Zoology* **2015**,  
586 *61*, 854–865. doi:10.1093/czoolo/61.5.854.
- 587 57. Brown, J.W.; Walker, J.F.; Smith, S.A. Phyx: Phylogenetic tools for unix. *Bioinformatics* **2017**, *33*, 1886–1888.  
588 doi:10.1093/bioinformatics/btx063.

- 589 58. Nguyen, L.T.; Schmidt, H.A.; Von Haeseler, A.; Minh, B.Q. IQ-TREE: A fast and effective stochastic  
590 algorithm for estimating maximum-likelihood phylogenies. *Molecular Biology and Evolution* **2015**,  
591 32, 268–274. doi:10.1093/molbev/msu300.
- 592 59. Kalyaanamoorthy, S.; Minh, B.Q.; Wong, T.K.; Von Haeseler, A.; Jermin, L.S. ModelFinder: Fast model  
593 selection for accurate phylogenetic estimates. *Nature Methods* **2017**, 14, 587–589. doi:10.1038/nmeth.4285.
- 594 60. Lanfear, R.; Calcott, B.; Kainer, D.; Mayer, C.; Stamatakis, A. Selecting optimal partitioning schemes for  
595 phylogenomic datasets. *BMC Evolutionary Biology* **2014**, 14, 82. doi:10.1186/1471-2148-14-82.
- 596 61. Hoang, D.T.; Chernomor, O.; Von Haeseler, A.; Minh, B.Q.; Vinh, L.S. UFBoot2: Improving the ultrafast  
597 bootstrap approximation. *Molecular Biology and Evolution* **2018**, 35, 518–522. doi:10.1093/molbev/msx281.
- 598 62. Guindon, S.; Dufayard, J.F.; Lefort, V.; Anisimova, M.; Hordijk, W.; Gascuel, O. New algorithms  
599 and methods to estimate maximum-likelihood phylogenies: Assessing the performance of PhyML 3.0.  
600 *Systematic Biology* **2010**, 59, 307–321. doi:10.1093/sysbio/syq010.
- 601 63. Andermann, T.; Cano, Á.; Zizka, A.; Bacon, C.; Antonelli, A. SECAPR—a bioinformatics pipeline for the  
602 rapid and user-friendly processing of targeted enriched Illumina sequences, from raw reads to alignments.  
603 *PeerJ* **2018**, 6, e5175. doi:10.7717/peerj.5175.
- 604 64. Li, H.; Durbin, R. Fast and accurate short read alignment with Burrows-Wheeler transform. *Bioinformatics*  
605 **2009**, 25, 1754–1760, [1303.3997]. doi:10.1093/bioinformatics/btp324.
- 606 65. McKenna, A.; Hanna, M.; Banks, E.; Sivachenko, A.; Cibulskis, K.; Kernysky, A.; Garimella, K.;  
607 Altshuler, D.; Gabriel, S.; Daly, M.; DePristo, M.A. The Genome Analysis Toolkit: a MapReduce  
608 framework for analyzing next-generation DNA sequencing data. *Genome research* **2010**, 20, 1297–303.  
609 doi:10.1101/gr.107524.110.
- 610 66. Li, H.; Barrett, J. A statistical framework for SNP calling, mutation discovery, association mapping and  
611 population genetical parameter estimation from sequencing data. *Bioinformatics* **2011**, 27, 2987–2993.  
612 doi:10.1093/bioinformatics/btr509.
- 613 67. Jombart, T.; Devillard, S.; Balloux, F. Discriminant analysis of principal components: A new method for the  
614 analysis of genetically structured populations. *BMC Genetics* **2010**, 11, 94. doi:10.1186/1471-2156-11-94.
- 615 68. Jombart, T. Adegnet: A R package for the multivariate analysis of genetic markers. *Bioinformatics* **2008**,  
616 24, 1403–1405. doi:10.1093/bioinformatics/btn129.

617 © 2020 by the authors. Submitted to *Plants* for possible open access publication under the terms and conditions  
618 of the Creative Commons Attribution (CC BY) license (<http://creativecommons.org/licenses/by/4.0/>).
